# Supplementary material for: Fluorescence tunable carbon dots for in vitro nuclear dynamics and gastrointestinal imaging in live zebrafish and their in vivo toxicity evaluation by cardio-craniofacial disfunction assessment
Source: Royal Society of Chemistry journal article supplement (doi:10.1039/d4nr04077e), 2024-12-23
Supplement: d4nr04077e1.pdf [file d4nr04077e1.pdf]

## Fluorescence Tunable Carbon Dots for *In-vitro* Nuclear Dynamics and Gastrointestinal Imaging in Live Zebrafish and their *in-vivo* toxicity evaluation by cardio-craniofacial disfunction assessment

Bijaideep Dutta<sup>\*a,b</sup>, Ashwini Waghmare<sup>c</sup>, Sourav Das<sup>d</sup>, Yogesh Bhargava<sup>c</sup>, A. Kumar<sup>d</sup>, A. K. Debnath<sup>e</sup>, K. C. Barick<sup>a,b\*</sup> and P. A. Hassan<sup>a,b</sup>

<sup>a</sup>Chemistry Division, Bhabha Atomic Research Centre, Trombay, Mumbai-400085, India

<sup>b</sup>Homi Bhabha National Institute, Anushaktinagar, Mumbai - 400094, India

<sup>c</sup>Molecular Engineering and Imaging Lab, Department of Microbiology, Dr. Harisingh Gour University (A Central University), Sagar-470003, M.P. India

<sup>d</sup>Radiation Biology and Health Sciences Division, Bhabha Atomic Research Centre, Mumbai 400085, India

<sup>e</sup>Technical Physics Division, Bhabha Atomic Research Centre, Trombay, Mumbai-400085, India

\*E-mail: [bijaideep@barc.gov.in](mailto:bijaideep@barc.gov.in), [kcbarick@barc.gov.in](mailto:kcbarick@barc.gov.in), Tel.: + 91 22 2559 0284

### Supplementary information

#### *Measurements of fluorescence quantum yield*

The QY of the synthesized FNCDs was measured based on an established procedure (Raji Atchudan et al., 2018; Wang et al., 2014) In brief, quinine sulfate in 0.1 M H<sub>2</sub>SO<sub>4</sub> was used as the reference standard. The QY was calculated according to the following equation (1):

$$QY (\%) = QY_R \frac{I_S A_R (n_S)^2}{I_R A_S (n_R)^2} \quad (1)$$

where, “I” is the measured integrated fluorescent emission intensity, “n” is the refractive index of the solvent, and “A” is the absorbance. The subscript “R” and “S” refers to the corresponding parameter of known fluorescent standard and for the synthesized sample, respectively.

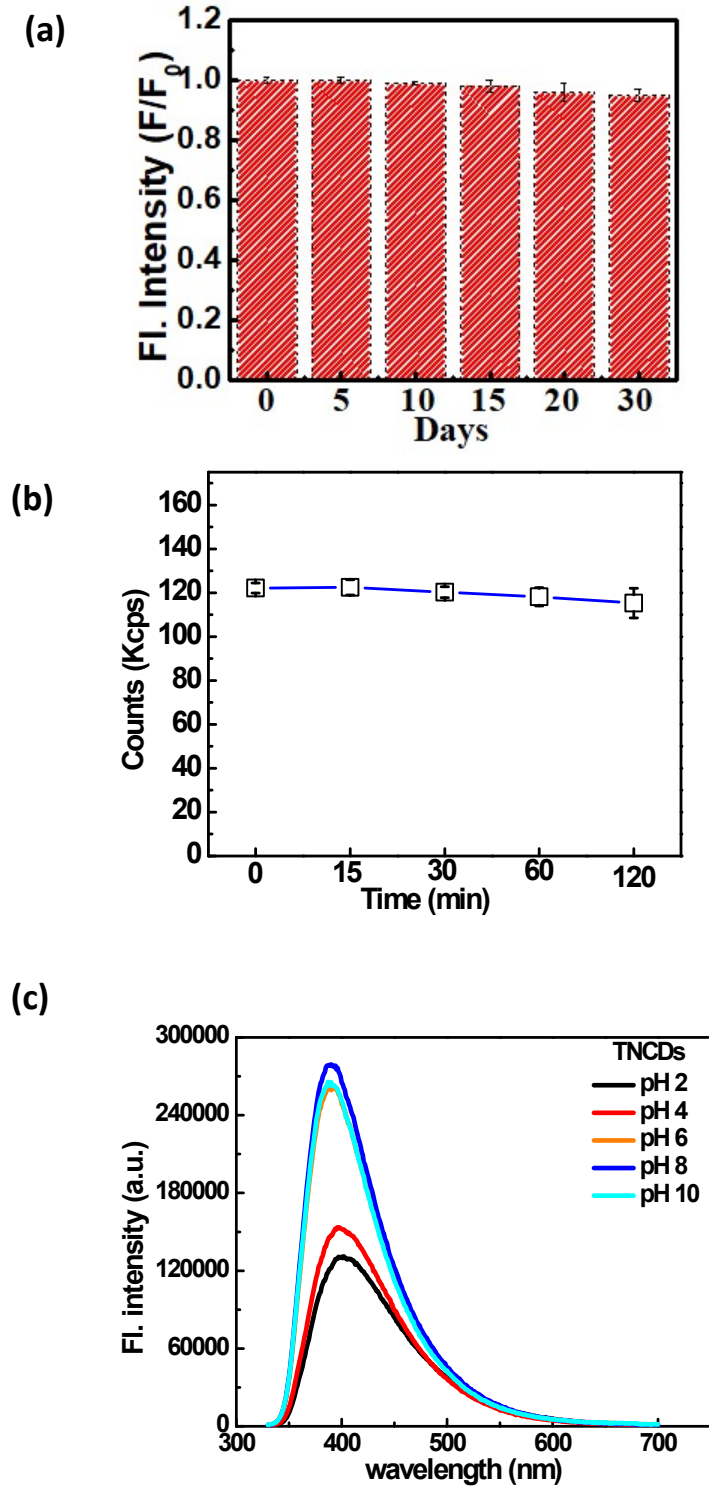

**Fig. S1:** (a) Storage stability of Carbon dots (TNCDs) for 30 days (b) colloidal stability measurement of TNCDs investigated by Dynamic Light Scattering instrument (DLS) and (c) pH dependent emission intensity variation of TNCDs

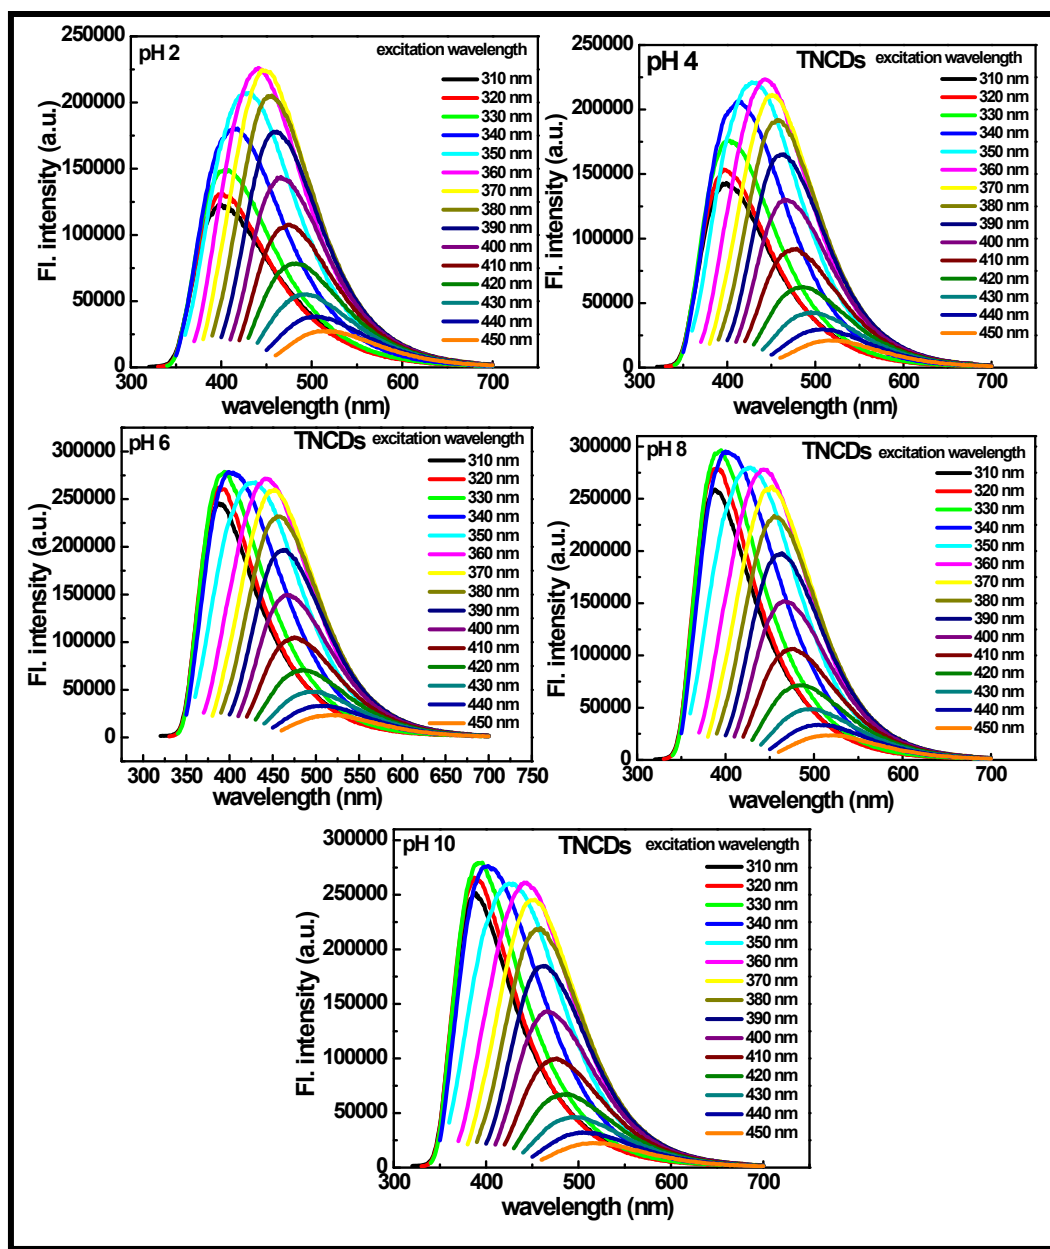

**Fig. S2:** Excitation dependent emission spectra of TNCDs at different pH

**Supplementary References:**

1. R. Atchudan, T. N. J. I. Edison, K. R. Aseer, S. Perumal, N. Karthik, Y. R. Lee, Highly fluorescent nitrogen-doped carbon dots derived from *Phyllanthus acidus* utilized as a fluorescent probe for label-free selective detection of Fe<sup>3+</sup> ions, live cell imaging and fluorescent ink. *Biosensors and Bioelectronics*, 2018, **99**, 303-311.
2. L. Wang, Y. Yin, A. Jain, H. S. Zhou, Aqueous phase synthesis of highly luminescent, nitrogen-doped carbon dots and their application as bioimaging agents. *Langmuir*, 2014, **30**, 14270–14275.
